# Supplementary material for: Biological Potential and Mechanism of Prodigiosin from Serratia marcescens Subsp. lawsoniana in Human Choriocarcinoma and Prostate Cancer Cell Lines
Source: MDPI journal article supplement (doi:10.3390/ijms19113465), 2018-11-04
Supplement: s1 [file s1]

# Biological Potential and Mechanism of Prodigiosin from *Serratia marcescens* Subsp. *lawsoniana* in Human Choriocarcinoma and Prostate Cancer Cell Lines

Dan Li <sup>1,2,3,†</sup>, Jun Liu <sup>4,\*,†</sup>, Xin Wang <sup>1,2,†</sup>, Di Kong <sup>2</sup>, Wei Du <sup>2</sup>, Hongbo Li <sup>2</sup>, Chung-Yun Hse <sup>5</sup>,  
Todd Shupe <sup>6</sup>, Dongpo Zhou <sup>1,2</sup> and Kai Zhao <sup>1,2,\*</sup>

<sup>1</sup> Engineering Research Center of Agricultural Microbiology Technology, Ministry of Education, Heilongjiang University, Harbin 150080, China; docor1005@163.com (D.L.); zhoudp0451@163.com (D.Z.)

<sup>2</sup> Key Laboratory of Microbiology, College of Heilongjiang Province, School of Life Science, Heilongjiang University, Harbin 150080, China; tianronghaise@126.com (X.W.); kongdi1110@126.com (D.K.); duweihappy123@163.com (W.D.); hljbobo@tust.edu.cn (H.L.)

<sup>3</sup> School of Pharmaceutical Sciences, Collaborative Innovation Center for Diagnosis and Treatment of Infectious Diseases, Tsinghua University, Beijing 100084, China

<sup>4</sup> College of Food and Biological Engineering, Qiqihar University, Qiqihar 161006, China

<sup>5</sup> USDA Forest Service Southern Research Station, Adhesive and Composite Laboratory, Pineville, LA 71360, USA; chse@fs.fed.us

<sup>6</sup> Louisiana Forest Products Development Center, School of Renewable Natural Resources, Louisiana State University Agricultural Center, Baton Rouge, LA 70803, USA; tfshupe@gmail.com

\* Correspondence: liujun3117@163.com (J.L.); zybin395@126.com (K.Z.); Tel.: +86-452-273-8743 (J.L.); +86-451-8660-8586 (K.Z.)

† These authors contributed equally to this work.

**Table S1.** Shape and growth temperature of strain HDZK-BYSB107.

| Characteristics            | Strain HDZK-BYSB107 | Standard strain<br>ATCC 8100 | Reference strains |                 |
|----------------------------|---------------------|------------------------------|-------------------|-----------------|
|                            |                     |                              | Strain HBU-01     | Strain FU-01    |
| Shape of strain body       | oval                | short rod                    | short rod         | short rod       |
| Arrangement of strain body | pairs or single     | single                       | single            | single          |
| Cell size (am)             | 0.45-0.55×0.75-0.85 |                              | 0.7-0.8×2.0-2.5   | 0.7-0.8×2.0-2.5 |
| Colony size (mm)           | 2.2                 |                              |                   |                 |
| Colony color               | dark red            | red                          | light red         | light red       |
| Lowest growth temperature  | 10° C               | 15° C                        | 15° C             | 15° C           |
| Optimum growth temperature | 28° C               | 37° C                        | 37° C             | 37° C           |
| Gram staining              | —                   | —                            | —                 | —               |
| Capstone                   | +                   | +                            | +                 | +               |

“+” positive reaction; “—” indicates negative reaction.

**Table S2.** Physiological and biochemical properties of strain HDZK-BYSB107.

| Characteristics                  | Strain HDZK-BYSB107 | Standard strain ATCC8100 | Reference strains |              |
|----------------------------------|---------------------|--------------------------|-------------------|--------------|
|                                  |                     |                          | Strain HBU-01     | Strain FU-01 |
| Anaerobic growth                 | +                   | +                        | +                 | +            |
| Motility                         | +                   | +                        | +                 | +            |
| Peroration & cattail             | +                   | +                        | +                 | +            |
| Growth with 2% Clonal            | +                   | +                        | +                 | +            |
| Growth with 6% Clonal            | +                   | —                        | —                 | —            |
| V-P reaction                     | +                   | +                        | +                 | +            |
| In dole                          | +                   | —                        | +                 | +            |
| Methyl red                       | —                   | —                        | —                 | —            |
| Cit rate utilization             | +                   | +                        | +                 | +            |
| H <sub>2</sub> S                 | —                   | —                        | —                 | —            |
| Gelatin hydrolysis (22° C)       | +                   | +                        | +                 | +            |
| Elysian declaratory              | —                   | —                        | —                 | —            |
| Arline hydro lase                | +                   | —                        | —                 | —            |
| Earthiness declaratory           | —                   | +                        | +                 | +            |
| Marinate utilization             | —                   | —                        | —                 | —            |
| Starch hydrolysis                | +                   | +                        | +                 | +            |
| Urea utilization                 | —                   | +                        | +                 | +            |
| Growth with 2% sucrose           | +                   | +                        | +                 | +            |
| Growth with 10% sucrose          | +                   | +                        | +                 | +            |
| Growth with 20% sucrose          | +                   | —                        | —                 | —            |
| Pigment                          | red                 | pink                     | pink              | pink         |
| Broth with 40% cholera           | —                   | —                        | —                 | —            |
| Acid production from glucose     | +                   | +                        | +                 | +            |
| Acid production from sucrose     | +                   | +                        | +                 | +            |
| Acid production from fructose    | +                   | +                        | +                 | +            |
| Acid production from salience    | +                   | +                        | +                 | +            |
| Acid production from loosely     | +                   | —                        | —                 | —            |
| Acid production from inseparable | —                   | —                        | —                 | —            |
| Acid production from rhinoceros  | +                   | —                        | —                 | —            |
| Acid production from Sorbonne    | —                   | —                        | —                 | —            |
| Acid production from absorbing   | —                   | —                        | —                 | —            |
| Acid production from raffishness | —                   | —                        | —                 | —            |
| Acid production from Mann        | —                   | —                        | —                 | —            |
| Acid production from mannish     | —                   | —                        | —                 | —            |

“+” positive reaction; “—” negative reaction.

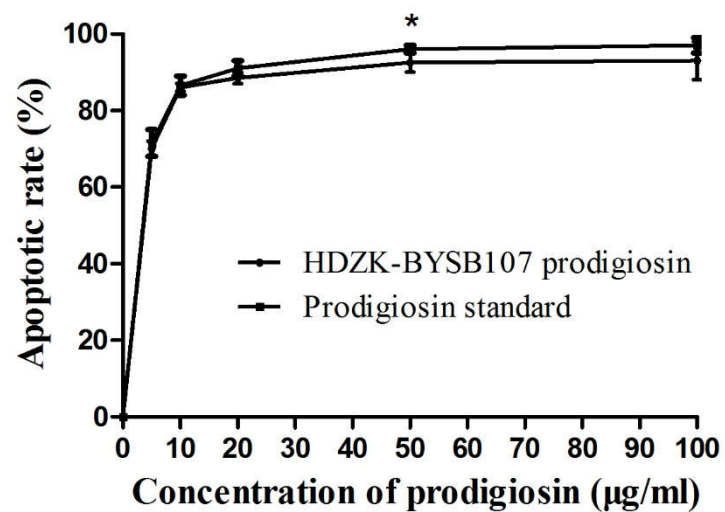

**Figure S1.** Apoptotic rate of JEG3 cells treated with the different concentration of strain HDZK-BYSB107 prodigiosin or prodigiosin standard.
